# Supplementary material
Source: publisher figshare collection journal article supplement (https://acs.figshare.com/ndownloader/files/34925728)
Supplement: Supplementary file 1 [file 34925728]

# Supporting Information

## **Nebulization Swab Assisted Photoionization Tandem Miniaturized Ion Trap Mass Spectrometry for On-site Analysis of Nonvolatile Compounds**

Weimin Wang<sup>1</sup>, Liuyu Jin<sup>1</sup>, Fengqing Hu<sup>2</sup>, Fuxing Xu<sup>1</sup>, Chuan-Fan Ding<sup>1, \*</sup>

<sup>1</sup> *Key Laboratory of Advanced Mass spectrometry and Molecular Analysis of Zhejiang Province, Institute of Mass spectrometry, School of Material Science and Chemical Engineering, Ningbo University, Ningbo, 315211, China*

<sup>2</sup> *Department of Cardiothoracic Surgery, Xinhua Hospital Affiliated to Shanghai Jiao Tong University School of Medicine, Shanghai, 200000, China*

\*Corresponding Author

E-mail: [dingchuanfan@nbu.edu.cn](mailto:dingchuanfan@nbu.edu.cn)

Tel &Fax: +86-0574-87605710

**Paper type: Communication**

## Molecular structure of analyzed nonvolatile compounds in this article

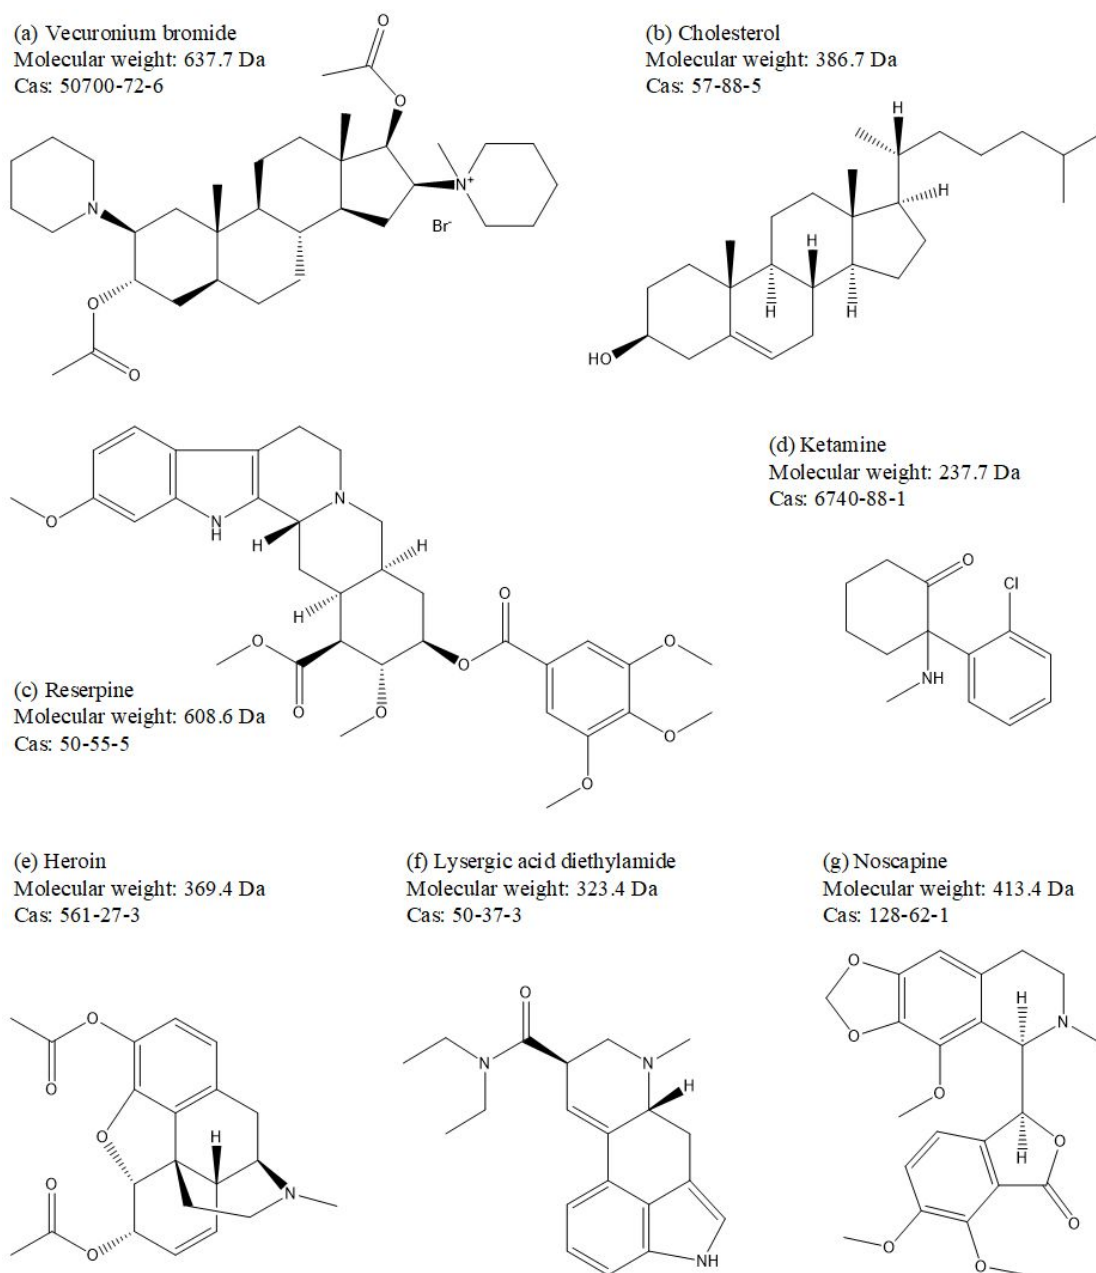

**Figure S-1.** The molecular structure and cas number of analyzed nonvolatile compounds in this article

## Numerical Simulation

A commercial CFD software package ANSYS Fluent (No commercial using) was customized to simulate flow dynamics and ion transport in the NSAP source<sup>1</sup>. Turbulent flow and heat transfer were modeled using the pressure-velocity coupled solver for the Navier-Stokes equations. Menter's Shear Stress Transport (SST)  $k-\omega$  turbulence model was applied for an unsteady/transient Reynolds Averaged N-S (RANS) simulation.

Species transport was manipulated to simulate the mixture of air and acetone. The boundary conditions used in the simulation and the detail simulation process were summarized in Table S-1. The particle motions were modeled via DPM (discrete phase model), which is a Eulerian-Lagrangian technique in which the particulate system was considered a continuum flow of gas containing numerous discrete particle parcels with each parcel comprised of a group of dilute physical particles<sup>2</sup>. Then, solutions for the airflow patterns were found by calculating approximate solutions of the described Navier-Stokes and continuity equations on a grid of control volumes. The simulation model was operated under the ambient pressure and temperature conditions, where the density of the gas was 1.225 kg/m<sup>3</sup>. The gas viscosity was  $1.79 \times 10^{-5}$  kg/(ms). The gas flow was simulated with second-order implicit unsteady solver with a time step of 0.0001 s. For the processing gas phase, a spatial discretization was performed that used a second-order upwind scheme for all conservation equations. Detail calculation process and equation derivation was not the point of this article, programmed files and project in this article are available for public download from github. (<https://github.com/wwm0909501/fluent-nebulization>)

**Table. S-1** Applied boundary conditions and parameters used in the fluent simulation

| Condition                     | Boundary condition                                      |
|-------------------------------|---------------------------------------------------------|
| Dopant Inlet/diameter         | Velocity inlet/2.5 mm                                   |
| Mass fraction of dopant inlet | Acetone (3.7 %), Oxygen (22.3 %), N <sub>2</sub> (74 %) |
| Outlet/diameter               | Pressure outlet(1atm)/ 2mm                              |
| Mass fraction of outlet       | Oxygen (21 %), N <sub>2</sub> (79%)                     |
| ionization chamber            | Wall/No slip/ (373 K)                                   |
| Gas temperature               | Constant temperature(300K)                              |
| Calculate type                | Steady/Pressure-based                                   |
| Turbulence model              | SST k-omega                                             |
| Species model                 | Species transport                                       |
| Injection Type                | Air-blast-atomizer                                      |
| Number of Streams             | 300                                                     |
| Relative Velocity             | 1.3 mL/min                                              |

## Designed NSAP source and infusion ESI source

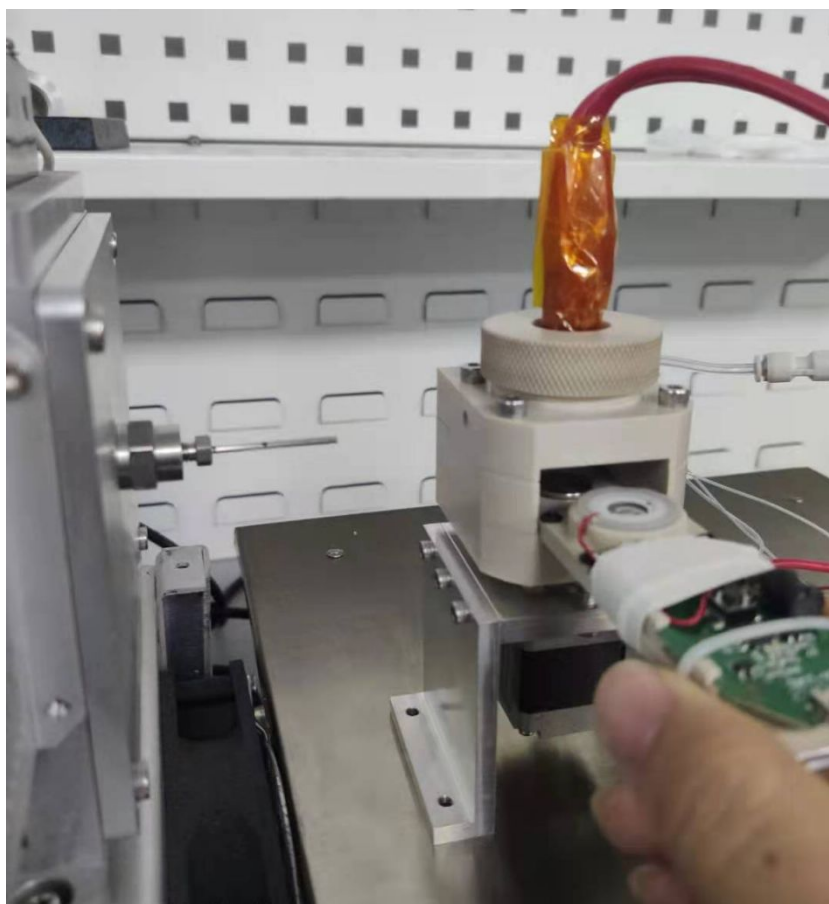

**Figure S-2.** Photograph of designed NSAP source

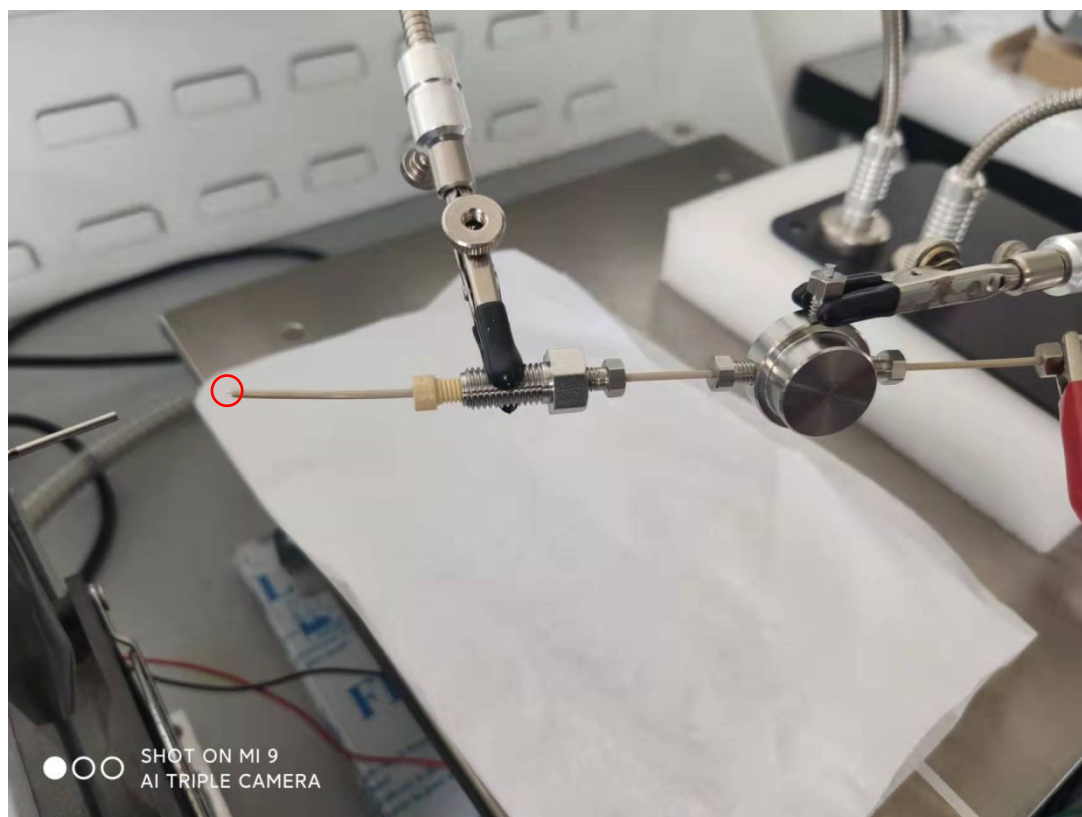

**Figure S-3.** Photograph of infusion ESI (10  $\mu\text{L}/\text{min}$ )

## Mass spectra comparison between the infusion ESI and NSAP source

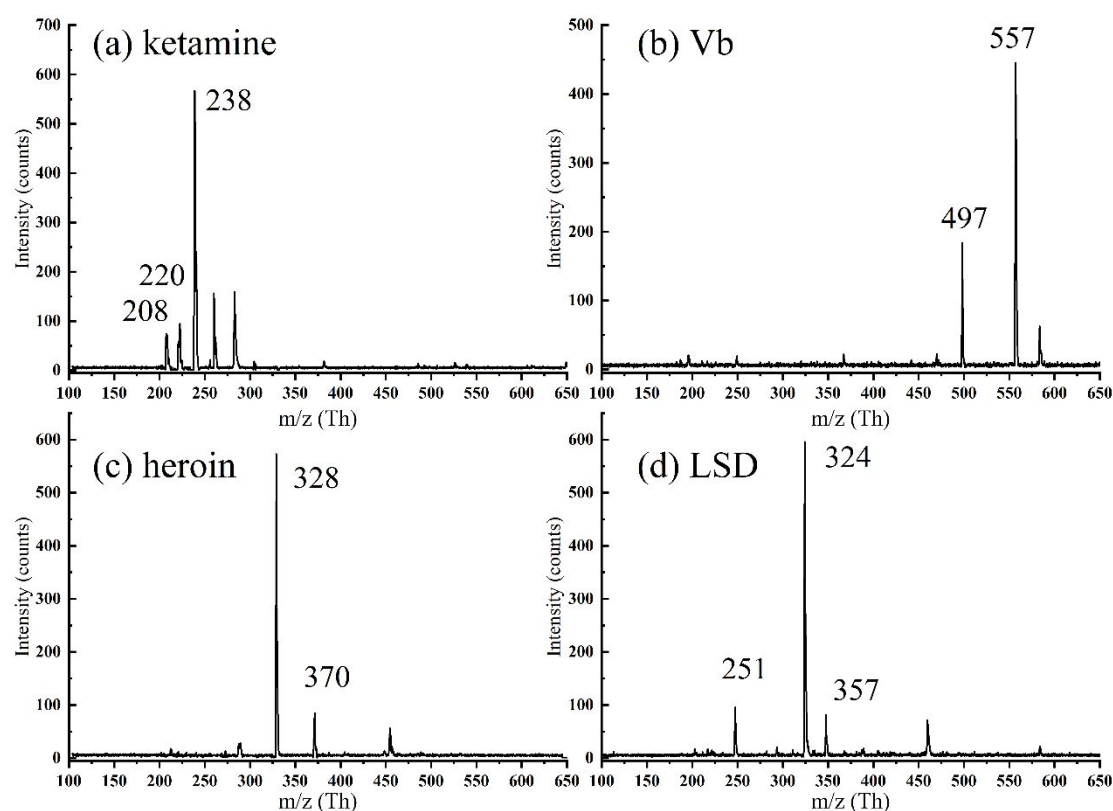

**Figure S-4.** Mass spectrums of four drugs (a) ketamine (b) Vb (c) heroin (d) LSD with infusion ESI system

**Table. S-2** The LODs for measured compounds obtained by using infusion ESI system

| Target compounds       | Characteristic ion<br>(m/z, Th)           | LOD                      |                                |
|------------------------|-------------------------------------------|--------------------------|--------------------------------|
|                        |                                           | Absolute<br>amount* (pg) | Concentration<br>(ppm)/(RSD %) |
| Ketamine               | 238.4 [M+H] <sup>+</sup>                  | 3.33                     | 0.02 (1.20 %)                  |
| LSD                    | 324.6 [M+H] <sup>+</sup>                  | 16.65                    | 0.1 (3.50 %)                   |
| Heroin                 | 328.4 [M+H] <sup>+</sup>                  | 33.30                    | 0.2 (4.26 %)                   |
| Fentanyl               | 337.5 [M+H] <sup>+</sup>                  | 83.30                    | 0.5 (4.77 %)                   |
| Cocaine                | 304.2 [M+H] <sup>+</sup>                  | 16.65                    | 0.1 (2.19 %)                   |
| Reserpine              | 609.7 [M+H] <sup>+</sup>                  | 166.70                   | 1 (5.67 %)                     |
| Noscapine              | 414.4 [M+H] <sup>+</sup>                  | 83.30                    | 0.5 (4.38 %)                   |
| Cholesterol            | 369.6 [M-H <sub>2</sub> O+H] <sup>+</sup> | 83.30                    | 0.5 (3.39 %)                   |
| Norfloxacin            | 320.3 [M+H] <sup>+</sup>                  | 33.30                    | 0.2 (4.61 %)                   |
| Chlorotetracycline     | 479.8 [M-Cl] <sup>+</sup>                 | 83.30                    | 0.5 (5.67 %)                   |
| Tetracycline           | 445.5 [M+H] <sup>+</sup>                  | 16.65                    | 0.1 (1.22 %)                   |
| Oxytetracycline        | 461.8 [M+H] <sup>+</sup>                  | 33.30                    | 0.2 (3.50 %)                   |
| Dinonyl phthalate, DOP | 419.6 [M+H] <sup>+</sup>                  | 833                      | 5 (6.85 %)                     |

|                                      |                           |       |              |
|--------------------------------------|---------------------------|-------|--------------|
| Didecyl phthalate, DIDP              | 447.6 [M+H] <sup>+</sup>  | 833   | 5 (7.90 %)   |
| Bis(2-ethylhexyl) phthalate,<br>DEHP | 391.6 [M+H] <sup>+</sup>  | 83.30 | 0.5 (4.11 %) |
| Vecuronium bromide                   | 557.7 [M-Br] <sup>+</sup> | 83.30 | 0.5 (4.50 %) |
| Rocuronium bromide                   | 529.7 [M-Br] <sup>+</sup> | 83.30 | 0.5 (5.90 %) |

\* The absolute amount is calculated from the concentration in 1 seconds.

### Mean particle diameter calculation

Typically, the mean droplet size produced by an ultrasonic nebulizer is expressed by Lang's equation<sup>3, 4</sup>:

$$D = A \left( \frac{8\pi\sigma}{\rho f^2} \right)^{1/3} \quad (1)$$

The value of A, an experimentally obtained coefficient, was reported to range between 0.34 and 0.45.  $\rho$  is the density of the droplet fluid where 0.787 g/mL was used. In this experiment, f is the frequency of the generated SAWN which is 2.5 MHz.  $\sigma$  is the surface tension of the bulk solution, and was calculated with equation (2):

$$\sigma = y_a\sigma_a + y_b\sigma_b \quad (2)$$

where  $y_a$  and  $y_b$  are the fractions of components a and b, respectively, and  $\sigma_a$  and  $\sigma_b$  are the surface tensions of the pure component solvents respectively, which were obtained by consulting the Lange's handbook of Chemistry. It is known that the surface tensions of pure water and pure methanol are 72.75 mN/m and 22.6 mN/m, respectively, at 20 °C. Therefore,  $\sigma$  can be calculated to be 47.98 mN/m. Bring the parameters A,  $\sigma$ , f and  $\rho$  into equation (1), the mean droplet size D could be calculated to be 2.12  $\mu$ m.

### Signal variation and duration of the ion signal

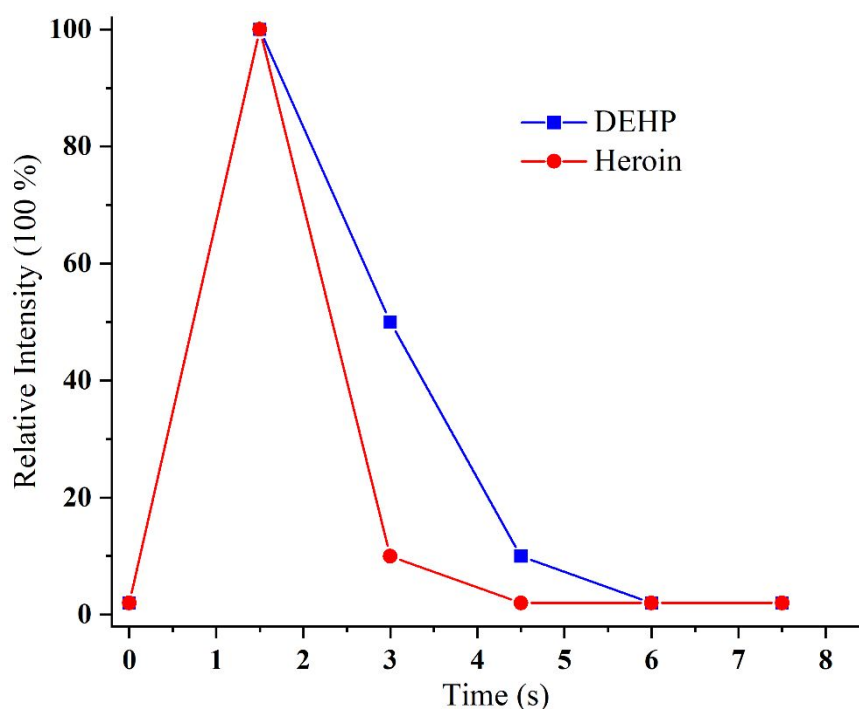

**Figure S-5** The TIC of 1 µg/mL DEHP and 1 µg/mL heroin standards

## References

1. Guide, A. F. T., ANSYS Fluent Tutorial Guide 18. *ANSYS Fluent Tutorial Guide 18* **2018**, 15317, 724-746.
2. Poozesh, S.; Jafari, S. M.; Akafuah, N. K., Interrogation of a new inline multi-bin cyclone for sorting of produced powders of a lab-scale spray dryer. *Powder Technology* **2020**, 373, 590-598.
3. Song, L.; You, Y.; Evans-Nguyen, T., Surface acoustic wave nebulization with atmospheric-pressure chemical ionization for enhanced ion signal. *Analytical chemistry* **2018**, 91 (1), 912-918.
4. Guo, Y.; Dennison, A.; Li, Y.; Luo, J.; Zu, X.-T.; Mackay, C.; Langridge-Smith, P.; Walton, A.; Fu, Y. Q., Nebulization of water/glycerol droplets generated by ZnO/Si surface acoustic wave devices. *Microfluidics and Nanofluidics* **2015**, 19 (2), 273-282.
